# Supplementary material for: Characteristics of adrenocortical carcinoma in South Korea: a registry-based nationwide survey
Source: PubMed Central journal article supplement — Endocr Connect. 2020 May 18;9(6):519–29. doi: 10.1530/EC-20-0196 (PMC7354716; doi:10.1530/ec-20-0196), 2020-05-18
Supplement: supplementary_table_1.pdf [file supplementary_table_1.pdf]

**Supplemental Table 1. Characteristics and findings according to presence of distant metastasis at diagnosis (n=174).**

|                             | Distant metastasis (-), n=116 |                  | Distant metastasis (+), n=58 |                  | P value |
|-----------------------------|-------------------------------|------------------|------------------------------|------------------|---------|
|                             | Available data                | Value *          | Available data               | Value *          |         |
| Age at diagnosis (years)    | 116                           | 51.5 (40.0-63.0) | 58                           | 50.0 (40.8-67.0) | 0.691   |
| BMI (kg/m <sup>2</sup> )    | 88                            | 22.8 (21.0-25.4) | 43                           | 23.3 (20.8-24.8) | 0.893   |
| Male                        | 116                           | 47 (40.5)        | 58                           | 35 (60.3)        | 0.014   |
| Initial symptom (yes)       | 68                            | 52 (76.5)        | 38                           | 33 (86.8)        | 0.199   |
| Functional tumor (yes)      | 83                            | 48 (57.8)        | 31                           | 21 (67.7)        | 0.335   |
| Lymph node metastasis (yes) | 2                             | 2 (100)          | 56                           | 18 (32.1)        | 0.115   |
| Remission (yes)             | 102                           | 87 (85.3)        | 47                           | 4 (8.5)          | < 0.001 |
| Recurrence (yes)            | 87                            | 41 (47.1)        | 4                            | 1 (25.0)         | 0.621   |
| CT                          |                               |                  |                              |                  |         |
| Tumor size (mm)             | 111                           | 76 (55-120)      | 55                           | 100 (68-140)     | 0.007   |
| Pre-contrast HU             | 48                            | 34.2 (30.6-39.0) | 20                           | 34.4 (31.6-39.5) | 0.701   |
| Complete adrenalectomy      | 114                           | 98 (86.0)        | 30                           | 27 (90.0)        | 0.764   |
| Pathology                   |                               |                  |                              |                  |         |
| Weiss score                 | 50                            | 4 (2.8-6.0)      | 10                           | 5.5 (3.8-7.3)    | 0.042   |
| Tumor size (mm)             | 106                           | 94 (60-130)      | 26                           | 130 (82.3-163.8) | 0.016   |
| Ki67 index                  | 26                            | 7 (4.5-16.25)    | 3                            | 10 (3-20)        | 0.677   |
| Mitotic count (/50HPF)      | 71                            | 8 (4-21)         | 21                           | 25 (7.5-57.5)    | 0.001   |
| Death (yes)                 | 81                            | 19 (23.5)        | 45                           | 29 (64.4)        | < 0.001 |

\* Continuous variables are presented as median (interquartile range), categorical variables as n (%).

Chi-square test, Fischer's exact test, and Mann-Whitney test were adopted for comparison.
