# Supplementary figures and images for: Characteristics of adrenocortical carcinoma in South Korea: a registry-based nationwide survey
Source: PubMed Central journal article supplement — Endocr Connect. 2020 May 18;9(6):519–29. doi: 10.1530/EC-20-0196 (PMC7354716; doi:10.1530/ec-20-0196), 2020-05-18

**Supplemental Figure 1. Crude incidence of adrenal cortical carcinoma in Korea between 2000 – 2014.**<sup>4</sup>

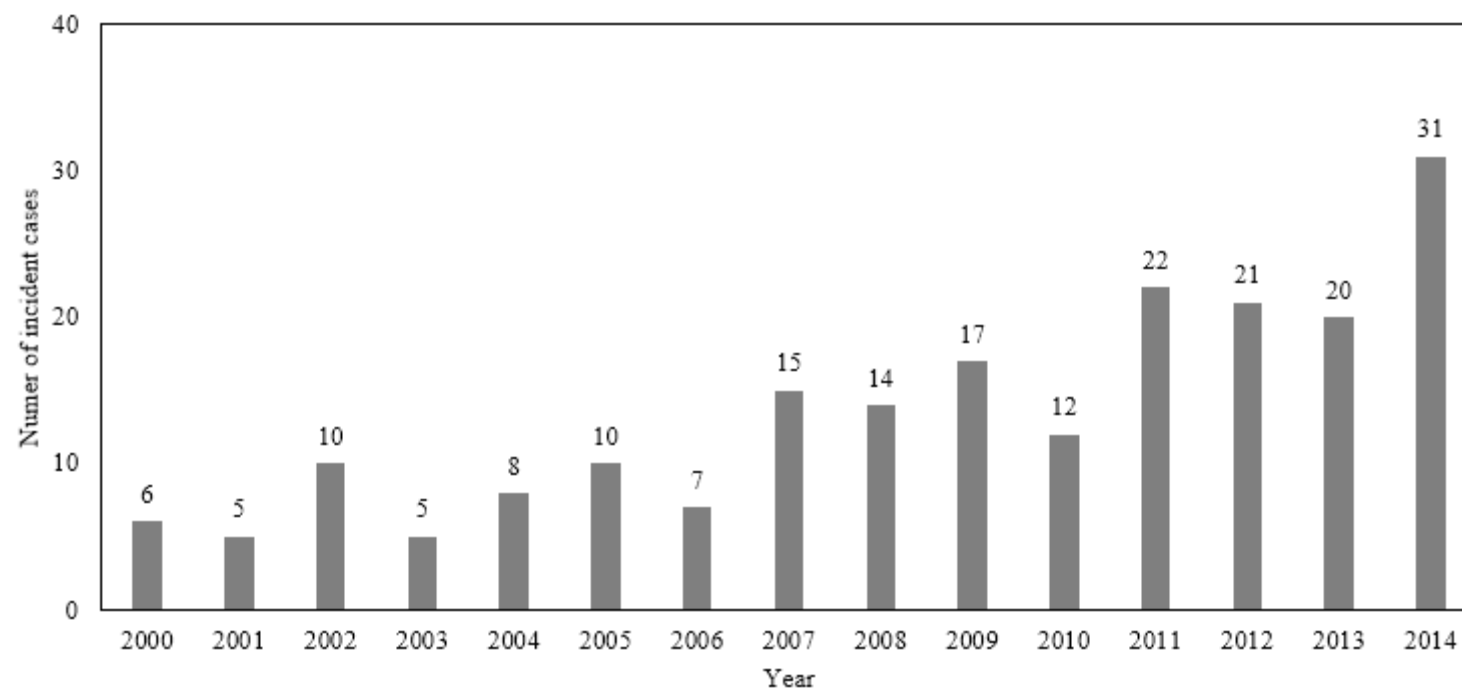

Supplement: supplementary_figure_1.pdf [file supplementary_figure_1.pdf]
